# Supplementary material for: Isolation of naturally associated bacteria of necromenicPristionchusnematodes and fitness consequences
Source: Oxford University Press journal article supplement (doi:10.1242/jeb.014944), 2008-05-30
Supplement: jeb014944-sup-014944-tables1.pdf [file jeb014944-sup-014944-tables1.pdf]

Table S1. Metagenomic survey of bacteria isolated from *Pristionchus lheriteri* from soil samples from Tübingen forest

| Worm | Identifier*                                                  | Count <sup>†</sup> | Average significance <sup>‡</sup> | Average bitscore <sup>§</sup> |
|------|--------------------------------------------------------------|--------------------|-----------------------------------|-------------------------------|
| 1    | <i>Stenotrophomonas</i> sp. Enf29; DQ339605168               | 14                 | 0.98                              | 1033.07                       |
|      | <i>Achromobacter xylosoxidans</i> ; wp22; AJ560626168        | 7                  | 0.99                              | 1102.00                       |
|      | Uncultured bacterium; rRNA377; AY959150168                   | 7                  | 0.99                              | 1160.71                       |
|      | Gamma proteobacterium ANJC2; DQ234444168                     | 5                  | 0.98                              | 1099.00                       |
|      | <i>Pseudomonas</i> sp. TB2-10-II; AY599715168                | 4                  | 0.99                              | 1302.25                       |
|      | Unknown sequence168                                          | 4                  | 0.00                              | 0.00                          |
|      | <i>Pseudomonas</i> sp. T2-2005; AY874539168                  | 3                  | 1.00                              | 1191.00                       |
|      | <i>Stenotrophomonas</i> sp.; dune 68; AJ884480168            | 3                  | 0.99                              | 1184.33                       |
|      | <i>Pseudomonas</i> sp. 6A; DQ417331168                       | 2                  | 0.99                              | 1046.50                       |
|      | <i>Pseudomonas</i> sp. Fa2; AY131214168                      | 2                  | 0.99                              | 956.50                        |
|      | <i>Pseudomonas</i> sp. P1-3-20; AJ969091168                  | 2                  | 1.00                              | 1163.50                       |
|      | Uncultured bacterium; EKHO-14; AF142897168                   | 2                  | 0.94                              | 632.50                        |
|      | Uncultured bacterium; EV818BHEB5102702SAS55; DQ256347168     | 2                  | 1.00                              | 532.00                        |
|      | Uncultured beta proteobacterium; CrystalBog2KF8; AY792247168 | 2                  | 1.00                              | 1003.00                       |
|      | Uncultured soil bacterium; UB7; DQ297972168                  | 2                  | 0.99                              | 877.00                        |
|      | <i>Achromobacter xylosoxidans</i> ; EE2-11-18; AM117450168   | 1                  | 0.99                              | 1011.00                       |
|      | Earthworm cast bacterium C29D1; AY039442168                  | 1                  | 0.99                              | 551.00                        |
|      | <i>Flavobacterium</i> sp. WB 4.3-20; AM177630168             | 1                  | 1.00                              | 1279.00                       |
|      | <i>Mesorhizobium</i> sp. GWS-BW-H238; AY332116168            | 1                  | 0.93                              | 1003.00                       |
|      | <i>Phyllobacterium ifriqiyense</i> ; STM 370; AY785325168    | 1                  | 0.98                              | 1152.00                       |
|      | <i>Phyllobacterium</i> sp. CCBAU 45127-2; DQ269499168        | 1                  | 0.99                              | 1294.00                       |
|      | <i>Pseudomonas brassicacearum</i> ; PD 5; DQ377746168        | 1                  | 1.00                              | 488.00                        |
|      | <i>Pseudomonas fluorescens</i> ; TM5-2; AB204715168          | 1                  | 1.00                              | 973.00                        |
|      | <i>Pseudomonas</i> sp. NZ011; AY014803168                    | 1                  | 0.99                              | 1035.00                       |
|      | <i>Pseudomonas</i> sp. PH-03; AY091598168                    | 1                  | 1.00                              | 940.00                        |
|      | <i>Pseudomonas</i> sp. WG7#1; AY263469168                    | 1                  | 0.99                              | 1193.00                       |
|      | <i>Pseudomonas</i> sp. WT OTU2; AY965247168                  | 1                  | 0.99                              | 1221.00                       |
|      | <i>Rhizobium</i> sp. ORS 1439; AY500257168                   | 1                  | 0.98                              | 1417.00                       |
|      | <i>Stenotrophomonas</i> sp. An27; AJ551165168                | 1                  | 0.99                              | 1289.00                       |
|      | Uncultured <i>Acidovorax</i> sp.; 5G35; AY177768168          | 1                  | 0.99                              | 1217.00                       |
|      | Uncultured bacterium; 300C-G04; AY662007168                  | 1                  | 1.00                              | 1352.00                       |
|      | Uncultured bacterium; BANW729; DQ264639168                   | 1                  | 0.95                              | 1035.00                       |
|      | Uncultured bacterium; cvf75037; AY100574168                  | 1                  | 0.98                              | 954.00                        |
|      | Uncultured bacterium; EV818EB5CPSAJJ33; DQ337037168          | 1                  | 0.97                              | 815.00                        |
|      | Uncultured bacterium; EV818SWSAP79; DQ337095168              | 1                  | 0.98                              | 1203.00                       |
|      | Uncultured bacterium; LOP-6; DQ241387168                     | 1                  | 0.99                              | 862.00                        |
|      | Uncultured bacterium; ML-3-43; DQ166455168                   | 1                  | 1.00                              | 511.00                        |
|      | Uncultured bacterium; rRNA222; AY958995168                   | 1                  | 0.99                              | 1291.00                       |
|      | Uncultured gamma proteobacterium; 5P50; AJ871072168          | 1                  | 0.90                              | 991.00                        |
|      | Uncultured gamma proteobacterium; MspS83; AY770720168        | 1                  | 0.98                              | 1055.00                       |
|      | Uncultured <i>Pseudomonas</i> sp.; EUB74; AY693823168        | 1                  | 1.00                              | 831.00                        |
|      | Uncultured <i>Pseudomonas</i> sp.; KTB_F3-1; AY623891168     | 1                  | 0.99                              | 1197.00                       |
|      | Uncultured soil bacterium; TA12; DQ297941168                 | 1                  | 0.99                              | 563.00                        |
|      | Uncultured soil bacterium; TA8; DQ297940168                  | 1                  | 0.99                              | 545.00                        |
|      | <i>Variovorax</i> sp. TM10_10; DQ279348168                   | 1                  | 0.99                              | 1255.00                       |
|      |                                                              |                    |                                   |                               |
| 2    | Unknown sequence173                                          | 47                 | 0.00                              | 0.00                          |
|      | <i>Variovorax</i> sp. c13; AB167194173                       | 7                  | 1.00                              | 1355.86                       |
|      | <i>Arthrobacter</i> sp. 20/4; DQ366002173                    | 4                  | 1.00                              | 1303.50                       |
|      | Uncultured bacterium; p-3415-SwA2; AF371861173               | 4                  | 1.00                              | 1310.25                       |
|      | Beta proteobacterium pfB24; AY336553173                      | 3                  | 1.00                              | 1237.33                       |
|      | <i>Pseudomonas</i> sp. BBCT8; DQ337559173                    | 3                  | 1.00                              | 1344.00                       |
|      | <i>Variovorax</i> sp. TM10_10; DQ279348173                   | 2                  | 1.00                              | 1319.50                       |
|      | <i>Alnus incana</i> ; U03555173                              | 1                  | 1.00                              | 1439.00                       |
|      | <i>Arthrobacter</i> sp. Tibet-IIVa3; DQ108397173             | 1                  | 1.00                              | 1267.00                       |
|      | <i>Propionibacterium acnes</i> ; PV66; AY642041173           | 1                  | 1.00                              | 1247.00                       |
|      | <i>Pseudomonas</i> sp. E4-1; DQ227349173                     | 1                  | 1.00                              | 1360.00                       |
|      | <i>Pseudomonas stutzeri</i> ; ZoBell (ATCC 14405); U26420173 | 1                  | 1.00                              | 1364.00                       |
|      | uncultured bacterium; EV818CFSSAH49; DQ336995173             | 1                  | 1.00                              | 1249.00                       |
|      | uncultured bacterium; Glu1; AF534192173                      | 1                  | 1.00                              | 1431.00                       |
|      | uncultured bacterium; KU71A; AY739681173                     | 1                  | 1.00                              | 1380.00                       |
|      | uncultured bacterium; SOB-31; AB126364173                    | 1                  | 1.00                              | 1183.00                       |

|   |                                                         |    |      |         |
|---|---------------------------------------------------------|----|------|---------|
| 3 | <i>Bordetella</i> sp. 1-3; DQ256466174                  | 12 | 0.98 | 1161.42 |
|   | <i>Flavobacterium</i> sp. 10B; AJ698832174              | 7  | 1.00 | 1219.86 |
|   | unknown sequence174                                     | 5  | 0.00 | 0.00    |
|   | <i>Flavobacterium johnsoniae</i> ; Jm162a; DQ256490174  | 4  | 0.95 | 1065.50 |
|   | uncultured bacterium; CRC11; AF392638174                | 4  | 0.98 | 892.00  |
|   | uncultured bacterium; HDBW-WB05; AB237668174            | 4  | 1.00 | 1140.25 |
|   | <i>Achromobacter xylosoxidans</i> ; wp22; AJ560626174   | 3  | 1.00 | 1117.00 |
|   | <i>Microbacterium</i> sp. BBCT30; DQ337545174           | 3  | 0.99 | 984.33  |
|   | <i>Microbacterium</i> sp. ZD-M2; DQ417926174            | 3  | 0.99 | 1288.33 |
|   | <i>Flavobacterium</i> sp. C204B; AF375835174            | 2  | 0.97 | 1285.50 |
|   | <i>Pedobacter panaciterrae</i> ; Gsoil 042; AB245368174 | 2  | 0.98 | 1107.50 |
|   | <i>Pseudomonas</i> sp. TB2-10-II; AY599715174           | 2  | 0.99 | 1175.50 |
|   | <i>Rhizobiaceae</i> bacterium Cpub 4; AY178080174       | 2  | 0.98 | 1192.50 |

\*Identifier: description of the best matching BLAST database record.

† Count: how many times a query sequence was isolated that matches this identifier.

‡ Average significance: the product that is calculated by the proportion of aligned query × fraction of identical bases (should be greater than 0.9)

§ Average bitscore: the average BLAST bitscore.
