# Supplementary material for: Isolation of naturally associated bacteria of necromenicPristionchusnematodes and fitness consequences
Source: Oxford University Press journal article supplement (doi:10.1242/jeb.014944), 2008-05-30
Supplement: jeb014944-sup-014944-tables2.pdf [file jeb014944-sup-014944-tables2.pdf]

Table S2. Metagenomic survey of bacteria isolated from *Pristionchu entomophagus* from soil samples from Tübingen forest

| Worm* | Identifier                                                             | Count <sup>†</sup> | Average significance <sup>‡</sup> | Average bitscore <sup>§</sup> |
|-------|------------------------------------------------------------------------|--------------------|-----------------------------------|-------------------------------|
| 1     | <i>Flavobacterium</i> sp. WB 3.1-78; AM177614169                       | 10                 | 0.99                              | 1134.60                       |
|       | Uncultured soil bacterium; F46_Pitesti; DQ378208169                    | 7                  | 1.00                              | 1085.14                       |
|       | Unknown sequence169                                                    | 6                  | 0.00                              | 0.00                          |
|       | <i>Flavobacterium hydatis</i> ; type strain: DSM 2063; AM230487169     | 5                  | 1.00                              | 1224.00                       |
|       | Uncultured bacterium; rRNA389; AY959162169                             | 5                  | 0.99                              | 1193.00                       |
|       | Uncultured <i>Pseudomonas</i> sp.; TM14_3; DQ279329169                 | 4                  | 1.00                              | 1058.50                       |
|       | <i>Pedobacter panaciterrae</i> ; Gsoil 042; AB245368169                | 3                  | 0.99                              | 1276.00                       |
|       | <i>Pseudomonas costantinii</i> (T); CFBP 5705; HAMB1 2444; AF374472169 | 3                  | 0.99                              | 1238.33                       |
|       | <i>Pseudomonas fluorescens</i> ; TM5-2; AB204715169                    | 3                  | 1.00                              | 960.67                        |
|       | <i>Pseudomonas</i> sp. NZ017; AY014805169                              | 3                  | 1.00                              | 1217.33                       |
|       | Uncultured bacterium; rRNA419; AY959192169                             | 3                  | 0.99                              | 989.67                        |
|       | Bacterium spb29A6-1; DQ321633169                                       | 2                  | 0.99                              | 1108.00                       |
|       | <i>Chryseobacterium</i> sp. BBTR48; DQ337589169                        | 2                  | 0.98                              | 1063.50                       |
|       | <i>Pseudomonas</i> sp. TB2-10-II; AY599715169                          | 2                  | 0.99                              | 1296.50                       |
|       | <i>Pseudomonas</i> sp. TM2_3; DQ279331169                              | 2                  | 0.99                              | 1299.50                       |
|       | <i>Pseudomonas</i> sp. WG7#1; AY263469169                              | 2                  | 1.00                              | 1246.00                       |
|       | Rape rhizosphere bacterium m9024; M9024; AJ295391169                   | 2                  | 0.97                              | 503.50                        |
|       | Uncultured bacterium; BANW568; DQ264536169                             | 2                  | 0.99                              | 629.50                        |
|       | Uncultured bacterium; rRNA427; AY959200169                             | 2                  | 1.00                              | 1165.50                       |
|       | Uncultured <i>Pedobacter</i> sp.; Cl-78-TB2-II; AY599665169            | 2                  | 0.99                              | 988.00                        |
|       | <i>Bosea</i> sp. TM19_7; DQ303323169                                   | 1                  | 1.00                              | 1185.00                       |
|       | <i>Chryseobacterium soldanellicola</i> ; PSD1-4; AY883415169           | 1                  | 0.98                              | 456.00                        |
|       | <i>Chryseobacterium</i> sp. TSBY-67; DQ166169169                       | 1                  | 0.97                              | 1128.00                       |
|       | <i>Erwinia billingiae</i> ; Eb661; AM055711169                         | 1                  | 1.00                              | 969.00                        |
|       | <i>Flavobacterium</i> sp. IsoC2; 169                                   | 1                  | 0.98                              | 999.00                        |
|       | <i>Flavobacterium</i> sp. WB 4.4-116; AM177640169                      | 1                  | 0.98                              | 963.00                        |
|       | <i>Pedobacter cryoconitis</i> (T); A37; AJ438170169                    | 1                  | 0.99                              | 1231.00                       |
|       | <i>Pedobacter</i> sp. TB4-9-II; AY599663169                            | 1                  | 0.99                              | 1227.00                       |
|       | <i>Pseudomonas fluorescens</i> PfO-1; CP000094169                      | 1                  | 0.99                              | 1118.00                       |
|       | <i>Pseudomonas fluorescens</i> ; CCM 2115; DQ207731169                 | 1                  | 0.99                              | 1189.00                       |
|       | <i>Pseudomonas kilonensis</i> ; PD 31; DQ377772169                     | 1                  | 0.98                              | 961.00                        |
|       | <i>Pseudomonas lini</i> ; PD 28; DQ377769169                           | 1                  | 0.99                              | 1215.00                       |
|       | <i>Pseudomonas putida</i> ; GM6; DQ133506169                           | 1                  | 0.99                              | 1019.00                       |
|       | <i>Pseudomonas rhizosphaerae</i> ; OW-2; AY866408169                   | 1                  | 0.99                              | 1320.00                       |
|       | <i>Pseudomonas</i> sp. CHNTR36; DQ337596169                            | 1                  | 1.00                              | 1039.00                       |
|       | <i>Pseudomonas</i> sp. Enf26; DQ339611169                              | 1                  | 1.00                              | 1039.00                       |
|       | <i>Pseudomonas</i> sp. JA03; DQ365568169                               | 1                  | 0.99                              | 1122.00                       |
|       | <i>Pseudomonas</i> sp. NN018591; AY166927169                           | 1                  | 1.00                              | 862.00                        |
|       | <i>Pseudomonas</i> sp.; S2; AJ002813169                                | 1                  | 0.96                              | 850.00                        |
|       | Uncultured bacterium; O15C-F01; AY661996169                            | 1                  | 0.98                              | 985.00                        |
|       | Uncultured bacterium; Car56rb; AF224809169                             | 1                  | 0.99                              | 1033.00                       |
|       | Uncultured bacterium; LOP-6; DQ241387169                               | 1                  | 1.00                              | 1247.00                       |
|       | Uncultured bacterium; ML-3-43; DQ166455169                             | 1                  | 0.99                              | 605.00                        |
|       | Uncultured bacterium; spb33c6; DQ321625169                             | 1                  | 0.98                              | 1096.00                       |
| 2     | Uncultured <i>Pseudomonas</i> sp.; SQ9_Pitesti; DQ366089170            | 23                 | 0.99                              | 1164.96                       |
|       | <i>Pseudomonas putida</i> ; Y2-8; DQ121396170                          | 10                 | 1.00                              | 1275.40                       |
|       | <i>Achromobacter xylooxidans</i> ; wp22; AJ560626170                   | 7                  | 0.99                              | 1107.71                       |
|       | <i>Stenotrophomonas</i> sp. Enf29; DQ339605170                         | 7                  | 1.00                              | 1157.14                       |
|       | <i>Pseudomonas</i> sp. FLM05-3; DQ084461170                            | 6                  | 1.00                              | 1341.50                       |
|       | Uncultured bacterium; 516; DQ158108170                                 | 5                  | 0.99                              | 1189.00                       |
|       | Gamma proteobacterium KIT2TW1; DQ234472170                             | 2                  | 0.99                              | 1167.50                       |
|       | <i>Pseudomonas fluorescens</i> ; FLM05-1; DQ084459170                  | 2                  | 0.99                              | 1265.00                       |
|       | <i>Pseudomonas</i> sp. dcm7B; AF430125170                              | 2                  | 0.99                              | 1385.50                       |
|       | uncultured bacterium; MP104-0916-b40; DQ088809170                      | 2                  | 0.99                              | 1146.00                       |
|       | <i>Variovorax</i> sp. TM10_10; DQ279348170                             | 2                  | 1.00                              | 1288.00                       |
|       | <i>Agrobacterium albertimagni</i> ; AOL15; AF316615170                 | 1                  | 0.98                              | 1229.00                       |
|       | bacterium M-A21a; AY661921170                                          |                    | 0.99                              | 729.00                        |
|       | <i>Bordetella avium</i> 197N; AM167904170                              | 1                  | 0.99                              | 1360.00                       |
|       | <i>Bordetella</i> sp. 1-3; DQ256466170                                 | 1                  | 0.99                              | 1322.00                       |
|       | <i>Flavobacterium</i> sp. WB 4.2-72; AM177626170                       | 1                  | 0.99                              | 1096.00                       |
|       | <i>Flavobacterium</i> sp. WB-1.1.56; AM177392170                       | 1                  | 0.99                              | 1296.00                       |
|       | <i>Pedobacter koreensis</i> ; WPCB189; DQ092871170                     | 1                  | 0.98                              | 773.00                        |
|       | <i>Pedobacter panaciterrae</i> ; Gsoil 042; AB245368170                | 1                  | 0.99                              | 1140.00                       |
|       | <i>Pseudomonas fluorescens</i> ; TM5-2; AB204715170                    | 1                  | 0.98                              | 1009.00                       |
|       | <i>Pseudomonas</i> sp. 131; AM184094170                                | 1                  | 1.00                              | 432.00                        |
|       | <i>Pseudomonas</i> sp. 2001; AM110960170                               | 1                  | 1.00                              | 432.00                        |

|   |                                                                        |    |      |         |
|---|------------------------------------------------------------------------|----|------|---------|
|   | <i>Pseudomonas</i> sp. BW11M1; AY118112170                             | 1  | 1.00 | 926.00  |
|   | <i>Pseudomonas</i> sp. FAIR/BE/F/GH94; AJ297355170                     | 1  | 0.99 | 1213.00 |
|   | <i>Pseudomonas</i> sp. Hugh1955; AB247208170                           | 1  | 1.00 | 950.00  |
|   | <i>Pseudomonas</i> sp. P2; DQ404013170                                 | 1  | 1.00 | 870.00  |
|   | <i>Pseudomonas syringae</i> ; 1; AM184090170                           | 1  | 1.00 | 815.00  |
|   | <i>Pseudomonas syringae</i> ; Lz4W; AJ576247170                        | 1  | 0.99 | 1308.00 |
|   | <i>Rhizobium yanglingense</i> ; CCBAU 71462; AF195031170               | 1  | 0.97 | 1320.00 |
|   | <i>Sinorhizobium</i> sp. 9702-M4; AF357225170                          | 1  | 0.97 | 1209.00 |
|   | <i>Sphingomonas</i> sp. Gamma1-7; AY771802170                          | 1  | 0.99 | 1178.00 |
|   | <i>Stenotrophomonas</i> sp. An27; AJ551165170                          | 1  | 1.00 | 1348.00 |
|   | <i>Stenotrophomonas</i> sp.; dune 68; AJ884480170                      | 1  | 1.00 | 1170.00 |
|   | uncultured bacterium O16A8; AF220325170                                | 1  | 1.00 | 842.00  |
|   | uncultured bacterium; BANW452; DQ264446170                             | 1  | 0.97 | 1461.00 |
|   | uncultured bacterium; ML-3-43; DQ166455170                             | 1  | 1.00 | 406.00  |
|   | uncultured bacterium; Phe2; AF534211170                                | 1  | 1.00 | 406.00  |
|   | unknown sequence170                                                    | 1  | 0.00 | 0.00    |
|   | <i>Variovorax</i> sp. c13; AB167194170                                 | 1  | 0.98 | 1243.00 |
|   | <i>Variovorax</i> sp. HI-I4; DQ205307170                               | 1  | 0.99 | 1332.00 |
| 3 | <i>Pseudomonas</i> sp. KBOS 17; AY653222171                            | 39 | 0.99 | 1105.82 |
|   | <i>Pseudomonas</i> sp. TM7_1; DQ279324171                              | 19 | 0.99 | 1210.00 |
|   | <i>Pseudomonas</i> sp. P1-3-20; AJ969091171                            | 16 | 0.99 | 1107.50 |
|   | <i>Pseudomonas</i> sp. SaO3; AF511508171                               | 12 | 0.99 | 1373.33 |
|   | <i>Pseudomonas</i> sp. 6A; DQ417331171                                 | 8  | 0.99 | 1147.12 |
|   | <i>Pseudomonas fluorescens</i> ; FLM05-1; DQ084459171                  | 3  | 0.99 | 1097.67 |
|   | <i>Stenotrophomonas</i> sp. Enf29; DQ339605171                         | 3  | 0.99 | 1081.33 |
|   | <i>Pseudomonas fluorescens</i> ; TM5-2; AB204715171                    | 2  | 0.99 | 1051.50 |
|   | <i>Stenotrophomonas</i> sp. An27; AJ551165171                          | 2  | 0.99 | 1134.00 |
|   | <i>Achromobacter xylosoxidans</i> ; wp22; AJ560626171                  | 1  | 1.00 | 1134.00 |
|   | <i>Pseudomonas fluorescens</i> ; ATCC 17573; AF094730171               | 1  | 0.98 | 1451.00 |
|   | uncultured bacterium; Phe67; AF534216171                               | 1  | 1.00 | 1023.00 |
|   | uncultured bacterium; PI73D06; AY939404171                             | 1  | 1.00 | 916.00  |
|   | uncultured soil bacterium; TG11; DQ297949171                           | 1  | 1.00 | 866.00  |
|   | unidentified bacterium; W4B-B08; AY345490171                           | 1  | 0.98 | 1229.00 |
| 4 | uncultured soil bacterium; M39_Pitesti; DQ378256172                    | 13 | 0.95 | 1066.62 |
|   | uncultured bacterium; EV818CFSSAHH49; DQ336995172                      | 9  | 1.00 | 1368.44 |
|   | uncultured bacterium; S-Jos_11; DQ017937172                            | 8  | 1.00 | 1010.00 |
|   | <i>Variovorax</i> sp. TM10_10; DQ279348172                             | 6  | 0.99 | 1291.00 |
|   | uncultured bacterium; rRNA349; AY959122172                             | 5  | 0.99 | 1262.40 |
|   | uncultured bacterium; rRNA389; AY959162172                             | 4  | 0.99 | 1257.25 |
|   | beta proteobacterium pfB24; AY336553172                                | 3  | 1.00 | 1243.00 |
|   | <i>Pseudomonas costantinii</i> (T); CFBP 5705; HAMBI 2444; AF374472172 | 3  | 1.00 | 1254.67 |
|   | <i>Alcaligenes</i> sp. 92; AY238499172                                 | 2  | 0.99 | 1290.50 |
|   | bacterium 1-4; DQ163939172                                             | 2  | 0.99 | 1136.50 |
|   | <i>Chryseobacterium</i> sp. C2+4; AF375834172                          | 2  | 0.98 | 1150.00 |
|   | <i>Chryseobacterium</i> sp. TSBY-67; DQ166169172                       | 2  | 0.98 | 1209.50 |
|   | <i>Propionibacterium acnes</i> ; PV66; AY642041172                     | 2  | 1.00 | 1330.00 |
|   | <i>Pseudomonas fluorescens</i> ; TC222; DQ402053172                    | 2  | 0.99 | 1380.00 |
|   | <i>Serratia fonticola</i> ; UTAD54; AY236502172                        | 2  | 1.00 | 1305.50 |
|   | uncultured actinobacterium; APe2_6; AB074624172                        | 2  | 1.00 | 1354.00 |
|   | uncultured bacterium; E067; DQ326631172                                | 2  | 1.00 | 1305.50 |
|   | <i>Achromobacter xylosoxidans</i> ; SoO7; AF511516172                  | 1  | 0.99 | 1263.00 |
|   | <i>Achromobacter xylosoxidans</i> ; wp22; AJ560626172                  | 1  | 0.99 | 1086.00 |
|   | <i>Alcaligenes</i> sp. s2; DQ237948172                                 | 1  | 0.99 | 1251.00 |
|   | arctic soil bacterium S1R1; DQ234512172                                | 1  | 0.99 | 1358.00 |
|   | bacterium Wuba47; AF336356172                                          | 1  | 0.98 | 1394.00 |
|   | <i>Bosea</i> sp. TM19_7; DQ303323172                                   | 1  | 1.00 | 1289.00 |
|   | <i>Chryseobacterium</i> sp. BBTR48; DQ337589172                        | 1  | 0.98 | 1203.00 |
|   | <i>Flavobacterium</i> sp. Enf62; DQ339596172                           | 1  | 0.98 | 1356.00 |
|   | <i>Methylobacterium</i> sp. iEII3; AY364020172                         | 1  | 0.99 | 1249.00 |
|   | <i>Pedobacter aurantiacus</i> ; DS-27; DQ235228172                     | 1  | 0.98 | 1215.00 |
|   | <i>Pedobacter roseus</i> ; CL-GP80; DQ112353172                        | 1  | 0.98 | 1118.00 |
|   | <i>Pseudomonas fluorescens</i> ; AF137359172                           | 1  | 1.00 | 787.00  |
|   | <i>Pseudomonas fluorescens</i> ; P26 0c1; AM086223172                  | 1  | 0.99 | 1269.00 |
|   | <i>Pseudomonas graminis</i> (T); DSM 11363 (type strain); Y11150172    | 1  | 1.00 | 1374.00 |
|   | <i>Pseudomonas putida</i> ; TauN2; AY823622172                         | 1  | 0.98 | 1245.00 |
|   | <i>Pseudomonas</i> sp. BWDY-27; DQ314541172                            | 1  | 0.99 | 1346.00 |
|   | <i>Pseudomonas</i> sp. Ens63; DQ339632172                              | 1  | 0.99 | 1168.00 |
|   | <i>Pseudomonas</i> sp. Hugh2090; AB247213172                           | 1  | 0.99 | 954.00  |

|                                                             |   |      |         |
|-------------------------------------------------------------|---|------|---------|
| <i>Pseudomonas</i> sp. TB2-10-II; AY599715172               | 1 | 1.00 | 1405.00 |
| rhizosphere soil bacterium BEM-880; AM110779172             | 1 | 0.97 | 1237.00 |
| <i>Serratia fonticola</i> (T); DSM 4576; AJ233429172        | 1 | 0.99 | 862.00  |
| <i>Serratia</i> sp. 9A_12; AY689059172                      | 1 | 0.99 | 1334.00 |
| <i>Stenotrophomonas</i> sp. Enf29; DQ339605172              | 1 | 1.00 | 1360.00 |
| uncultured bacterium; 005C-B03; AY661994172                 | 1 | 0.94 | 1027.00 |
| uncultured bacterium; JE100; DQ004755172                    | 1 | 0.99 | 1370.00 |
| uncultured bacterium; rRNA267; AY959040172                  | 1 | 0.99 | 1396.00 |
| uncultured bacterium; rRNA269; AY959042172                  | 1 | 1.00 | 1197.00 |
| uncultured bacterium; rRNA375; AY959148172                  | 1 | 0.99 | 1243.00 |
| uncultured bacterium; rRNA427; AY959200172                  | 1 | 1.00 | 1243.00 |
| uncultured bacterium; S301D; AM158352172                    | 1 | 0.99 | 561.00  |
| uncultured bacterium; T303D; AM158415172                    | 1 | 0.99 | 1281.00 |
| uncultured organism; MC0610c2; AY897998172                  | 1 | 1.00 | 1390.00 |
| uncultured phototrophic eukaryote; RS 8-Bact35; AJ867652172 | 1 | 1.00 | 1461.00 |
| uncultured <i>Pseudomonas</i> sp.; JT75-312; AB189378172    | 1 | 1.00 | 1332.00 |
| uncultured soil bacterium; F46_Pitesti; DQ378208172         | 1 | 0.99 | 1065.00 |
| uncultured soil bacterium; TIIA5; DQ297951172               | 1 | 0.98 | 1340.00 |
| unknown sequence172                                         | 1 | 0.00 | 0.00    |
| <i>Variovorax</i> sp. HI-I4; DQ205307172                    | 1 | 0.99 | 1265.00 |
| <i>Variovorax</i> sp. MG51; AJ746108172                     | 1 | 0.99 | 1158.00 |
| <i>Xanthomonas</i> sp. TM5_6; DQ279313172                   | 1 | 1.00 | 1380.00 |

\*Identifier: description of the best matching BLAST database record.

†Count: how many times a query sequence was isolated that matches this identifier.

‡Average significance: the product that is calculated by the proportion of aligned query×fraction of identical bases (should be greater than 0.9).

§Average bitscore: the average BLAST bitscore.
